# Supplementary material
Source: Royal Society of Chemistry journal article supplement (doi:10.1039/d6ay00317f)
Supplement: d6ay00317f1.xlsx [file d6ay00317f1.xlsx]

## Sheet: IMOGI
				IMOGI (Innovative Method Orange Gradient Index)		v
				Questions	Response	Score														Questions	score 0-2	Q1	Q2	Q3	Q4	Q5	Q6	Q7	Q8	Q9	Q10
			1	To what extent is the analytical process automated, including sample preparation, instrumental analysis, and data processing?"	Fully automated with minimal human intervension	2						1	0	0						Q1	2	Fully automated workflow with minimal human intervention (e.g. robotic systems, online analyses etc.)	Fully miniaturized, uses lab-on-a-chip, sensors, microfluidics, or portable miniaturized system	Fully remote or cloud-controllable; users can operate, monitor, and analyze data from any location in real time.	Fully integrates AI, ML, or advanced digital analytics for prediction, optimization, data interpretation, or automated decision-making. Examples: AI-assisted modeling, predictive algorithms, big data analytics, blockchain-enabled traceability, or software with adaptive learning.	Designed for easy upgrade and integration (e.g. modular microfluidic device with API-ready control system)	Entirely new approach, principle, technology, or theoretical framework; investigates previously unexplored analytes or matrices; investigates previously unexplored analytes or matrices	Uses completely new reagents, nanomaterials, or selective probes (e.g., graphene, nanostructures, NADES, carbon dots, MIPs, etc.	Substantially faster, more reproducible and higher throughput than conventional methods	Fully integrates two or more fields to create new capabilities or innovative approaches leading to genuine cross-field advancement. (e.g., Chemistry + Microfluidics → lab-on-a-chip systems; Biology + Materials Science → biosensors using nanomaterials; Analytical Chemistry + AI → predictive or adaptive data analysis)	Method applies all relevant green and white chemistry principles; systematically uses metrics/indexes (AGREE, AGREEprep, MoGAPI, BAGI, RAPI) to assess performance
			2	To what extent is the analytical system miniaturized or based on micro-scale or nano-scale technology?	Fully miniaturized	2						1	0	0						Q2	2	Partially automated (some manual steps remain)	Partially miniaturized, e.g. SPME, MEPS, DLLME for sample preparation, and/or compact or benchtop instruments e.g., compact GC or benchtop mass spectrometers etc.	Limited remote access or partial features; some data or control functions are available remotely, but key operations require on-site intervention (e.g., semi-automated GC system with web monitoring).	Uses digital or computational tools in a modified, enhanced, or extended way for limited tasks such as calibration, trend detection, or data visualization. Examples: using chemometric models or improved statistical software.	Adaptable with some modifications (e.g. analytical platform with partial scripting or remote access capability)	Modifies an existing method in a meaningful way; extends method to new contexts (e.g., improved microfluidic assay for better throughput, modified SPE sorbent).	Adapts known reagents or materials in a slightly innovative way (e.g., modified SPE sorbent).	Moderate improvement in speed/ reproducibility, or throughput	Uses a second field to support or enhance the method, but core analysis remains conventional (e.g., incorporating chemometrics to improve chromatographic interpretation; using engineering expertise for automated sampling)	Method applies few principles; metrics/indexes may be used inconsistently (only 1 0r 2).
			3	To what extent does the method employ advanced instrumentation for sample preparation or analysis?	Fully advanced technologies utilized (e.g. MS/MS)	2						1	0	0						Q3	2	Entirely manual (e.g. classical liquid-liquid extraction, manual SPE)	Conventional large-scale system	On-site manual operation only; no digital or network connectivity for remote control or monitoring (e.g. Standalone spectrophotometer or manual titration system without internet or wireless capability)	Uses standard or routine data processing or software without digital enhancement. Conventional tools applied in a typical manner (e.g., basic Excel statistics or manual data handling).	Not adaptable, requires redesign (e.g. manual titration setup with no electronic interface)	Routine normal application; applies an established method without significant change (e.g., standard ELISA).	Uses conventional materials or reagents (e.g. standard antibodies or common solvents like methanol, acetonitrile, etc.)	Comparable or worse performance/no significant gains	Stays within a single field with no meaningful integration (e.g., routine GC/HPLC, standard extraction procedure)	Method does not apply any green or white chemistry principle; metrics/indexes not used.
			4	To what extent does the method utilize advanced digital tools, data analytics, or artificial intelligence (AI/ML) for analysis, optimization, or interpretation?	Fully integrates AI or advanced digital analytics	2			100			1	0	0						Q4	2
			5	How adaptable or scalable is the method for future AI, automation integration or application to new analytes or matrices?	Designed for easy upgrade and integration	2						1	0	0						Q5	2	Fully , Partially , Entirely	Fully,Partially,Conventional	Fully, Limited, manual	Fully integrates,Uses digital, Uses standard	Designed,Adaptable,Not	New,Existing,Routine	new reagents,known reagents,conventional
			6	To what extent does the method introduce a novel concept, principle, or mechanism?	Entirely new approach/principle/technology	2						1	0	0						Q6	2
			7	To what extent does the method utilize novel reagents, materials, or probes?	Uses completely new reagents/nanomaterials/selective probes	2						1	0	0						Q7	2				Fully integrates AI or advanced digital analytics,Uses digital or computational tools in a modified or extended way,Uses standard or routine data processing or software without digital enhancement
			8	To what extent does the method improve efficiency, throughput, or overall performance compared to existing methods?	Substantially faster/more senstive/higher throughput than conventional methods	2						1	0	0						Q8	2			100	Entirely new approach, principle, technology, or theoretical framework,Modifies an existing method in a meaningful way or extends method to new contexts,Routine normal application or applies an established method without significant change
			9	To what extent does the method integrate knowledge from multiple scientific fields or foster interdisciplinary collaboration?	Fully intergrates two or more fields to create new capabilities or innovative approaches leading to genuine advancement	2						1	0	0						Q9	2				Uses completely new reagents, nanomaterials, or selective probes, Adapts known reagents or materials in a slightly innovative way,Uses conventional materials or reagents
			10	To what extent does the analytical method consider the principles of green and white analytical chemistry and incorporate recognized evaluation metrics or indexes (e.g. AGREE, AGREEprep, MoGAPI, BAGI, RAPI)?	Considers all principles/many metrics are used	2						1	0	0						Q10	2				Substantially faster, more reproducible and higher throughput than conventional methods,Moderate improvement in speed/ reproducibility, or throughput,Comparable or worse performance
						20													100						Fully integrates two or more fields to create new capabilities or innovative approaches leading to genuine cross-field advancement,Uses a second field to support or enhance the method, but core analysis remains conventional,Stays within a single field with no meaningful integration
						100													0						Considers all analytical chemistry principles, metrics or indexes, Applies few analytical chemistry principles, metrics or indexes,Does not apply any chemistry principles, metrics or indexes
						fdsd
				Score	Count
				Full (2)	10
				Partial (1)	0
				None (0)	0
